# Supplementary material
Source: PubMed Central journal article supplement (PMC6072278)

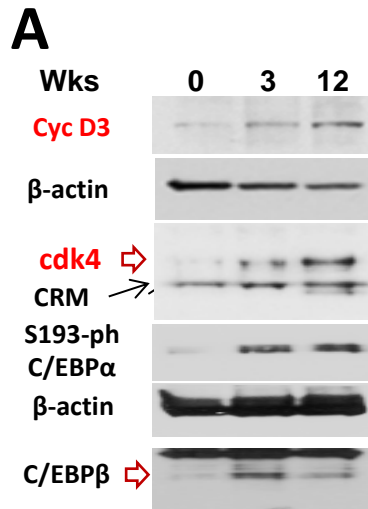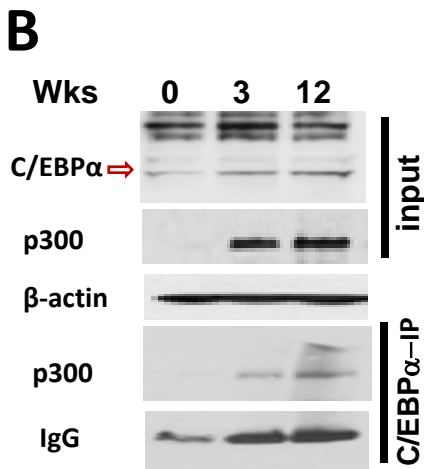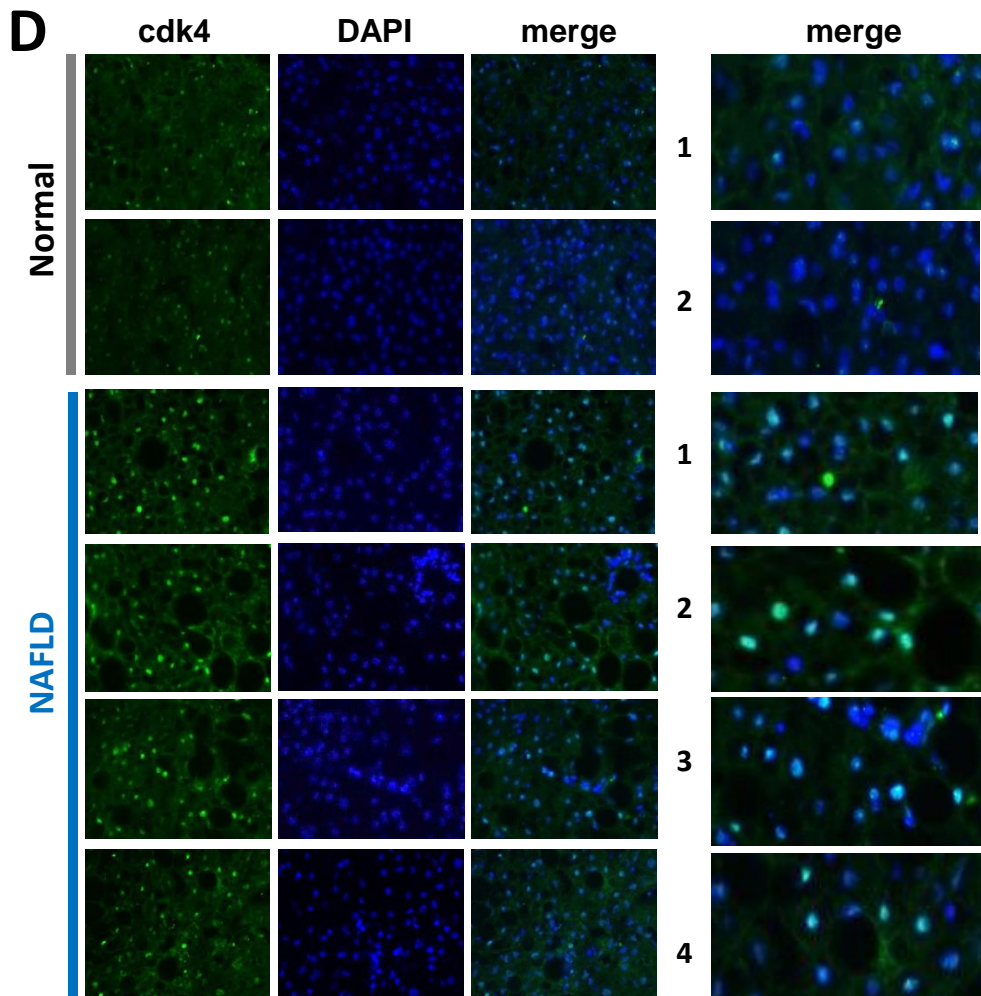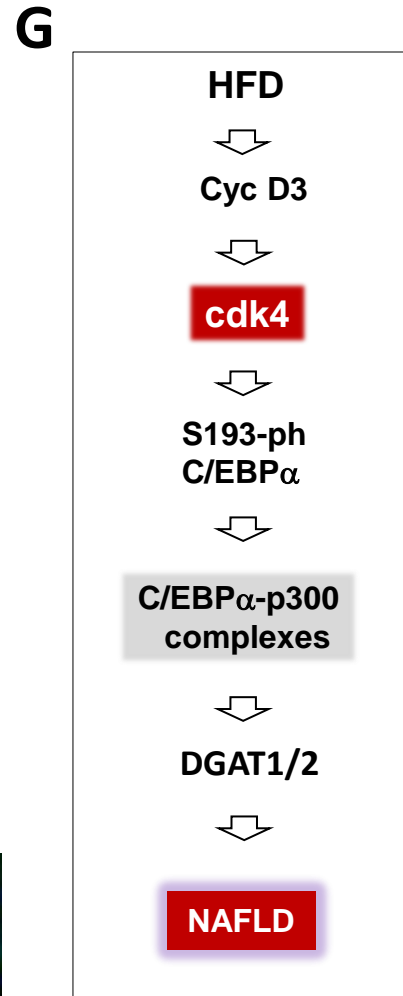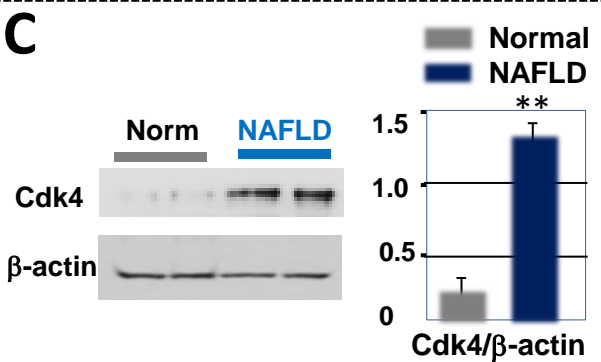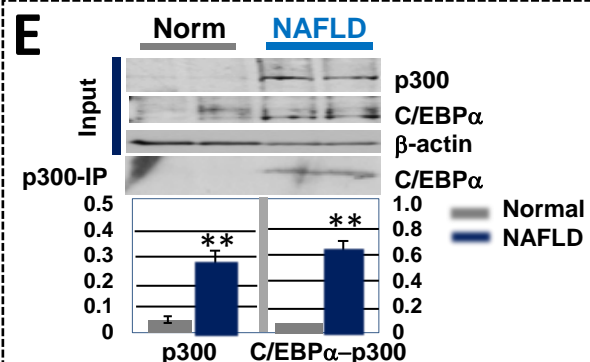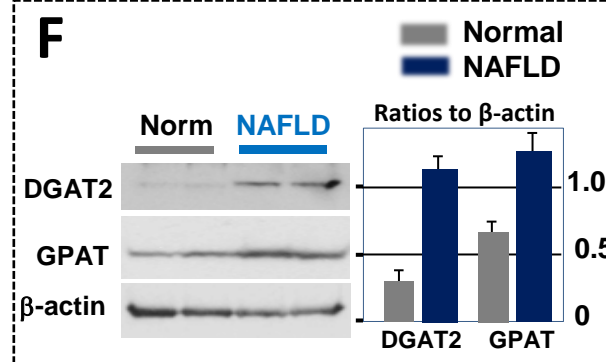

Supplement: NIHMS795342-supplement-1.pdf [file NIHMS795342-supplement-1.pdf]

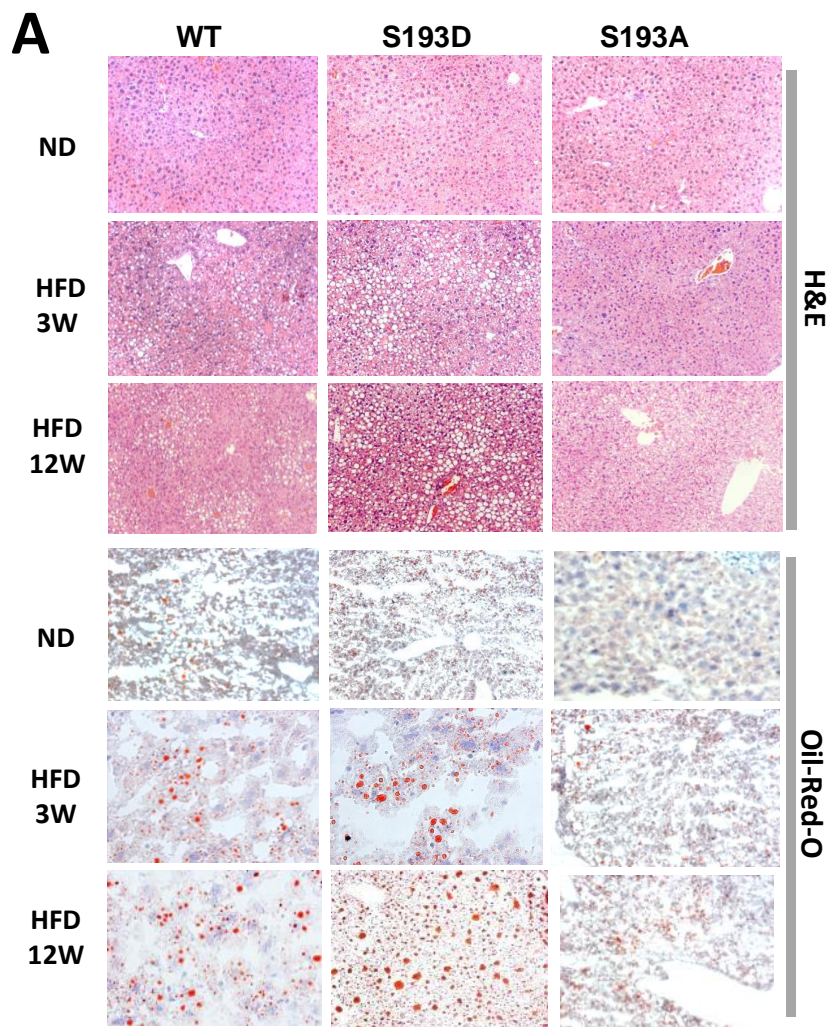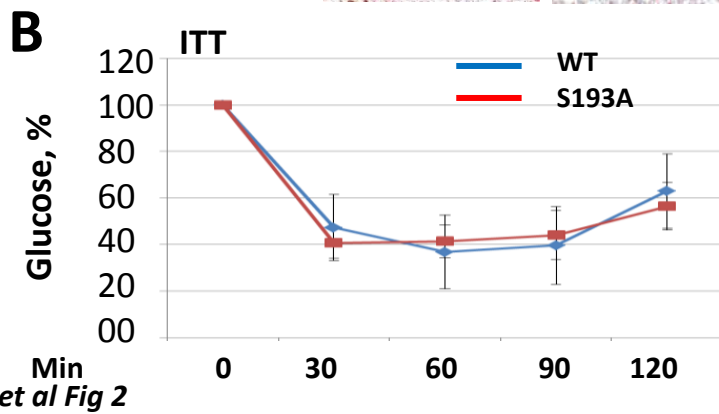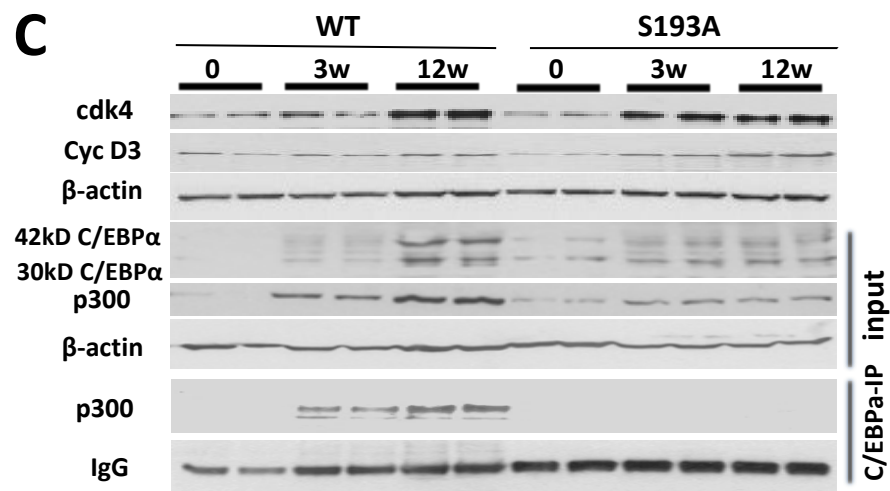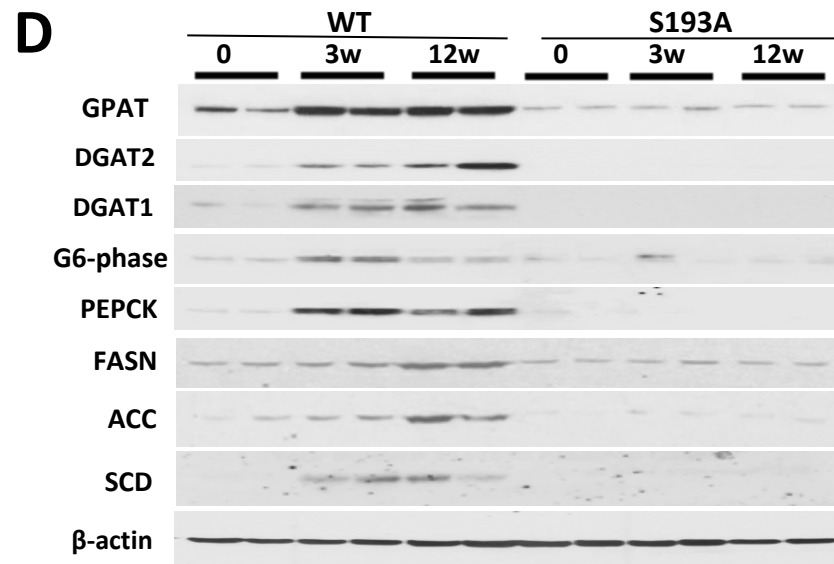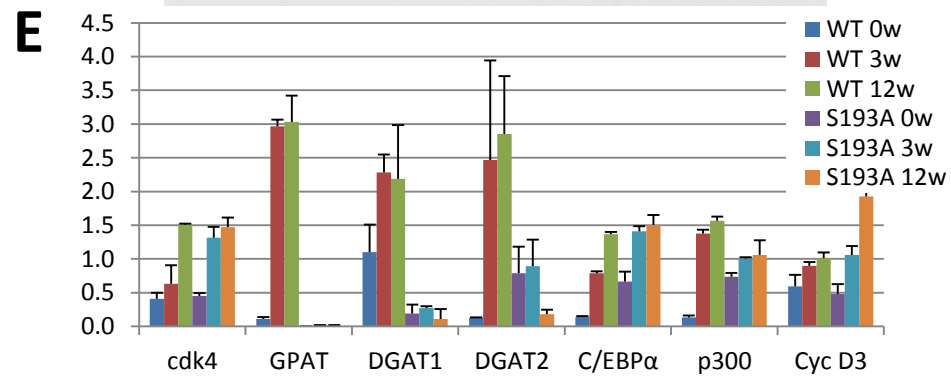

Supplement: NIHMS795342-supplement-2.pdf [file NIHMS795342-supplement-2.pdf]

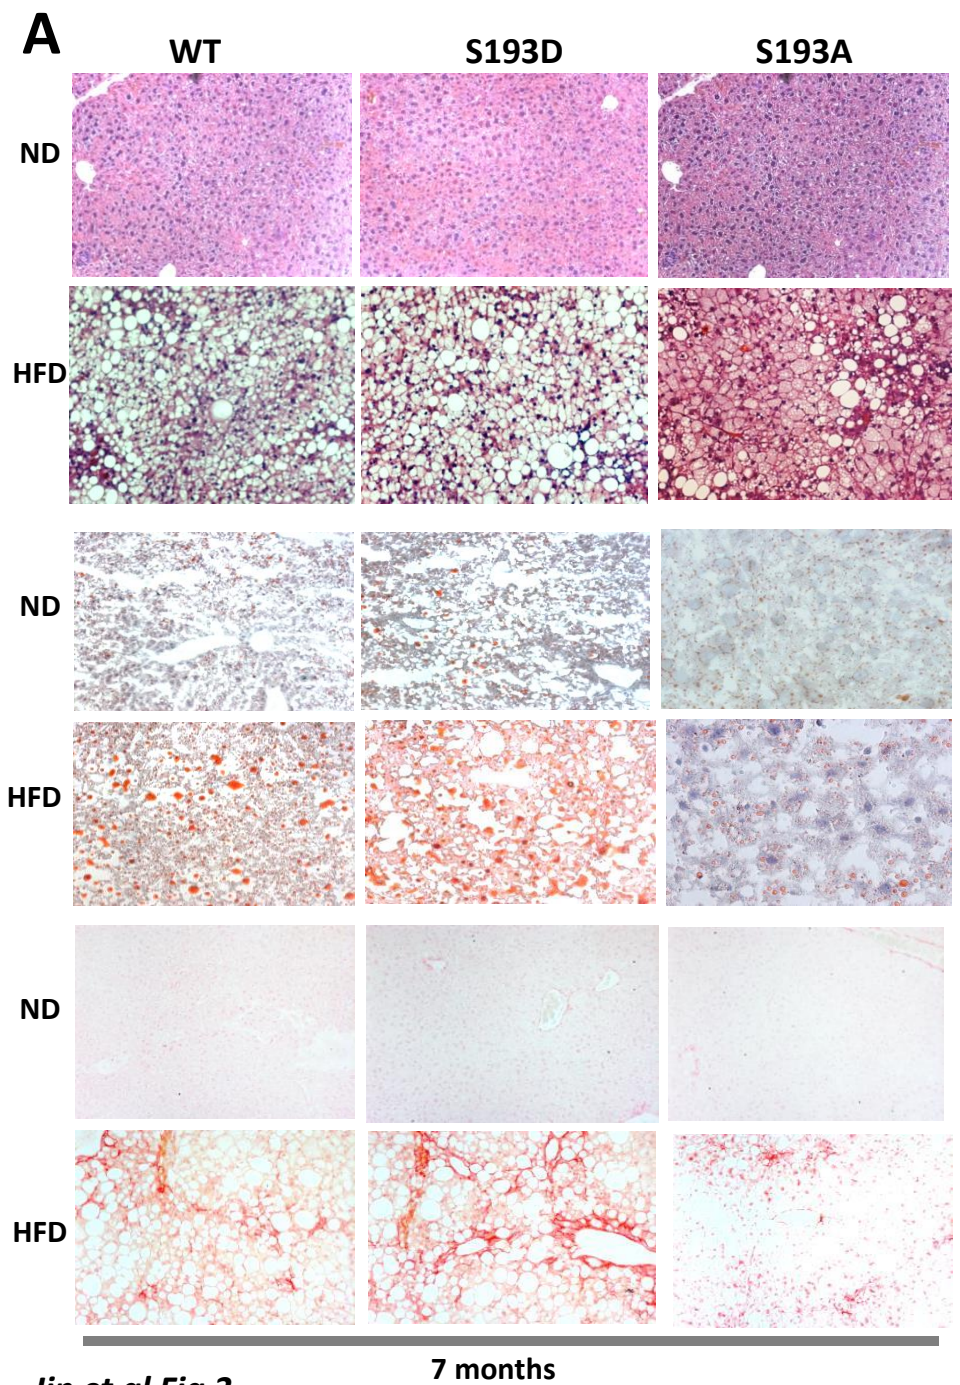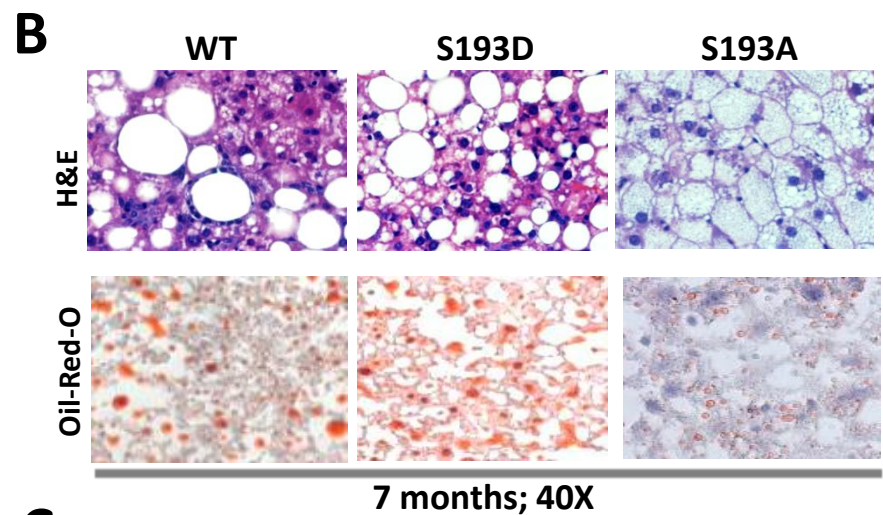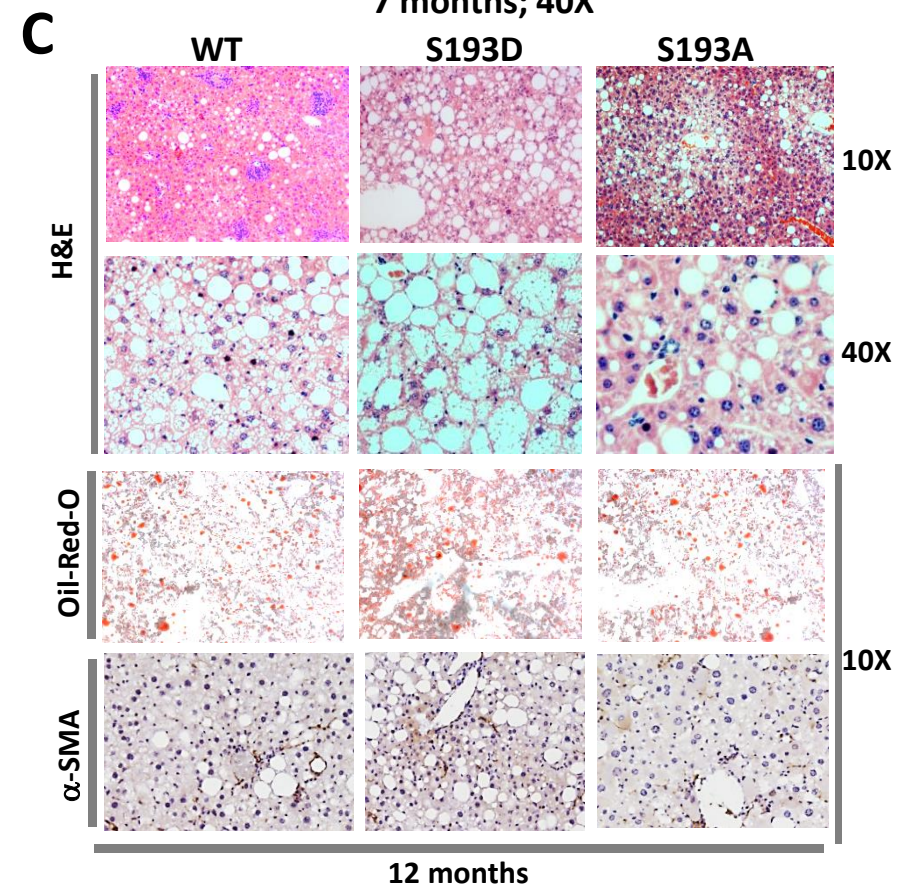

Supplement: NIHMS795342-supplement-3.pdf [file NIHMS795342-supplement-3.pdf]

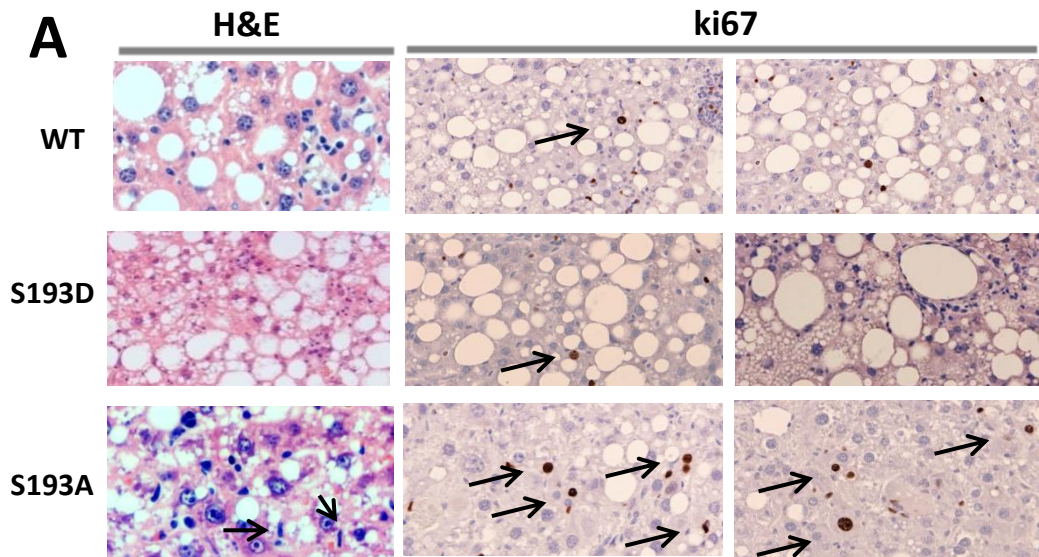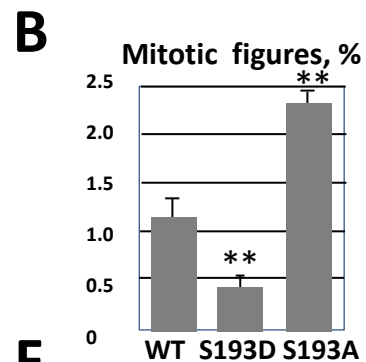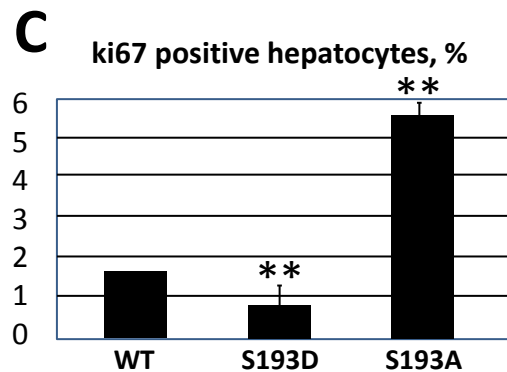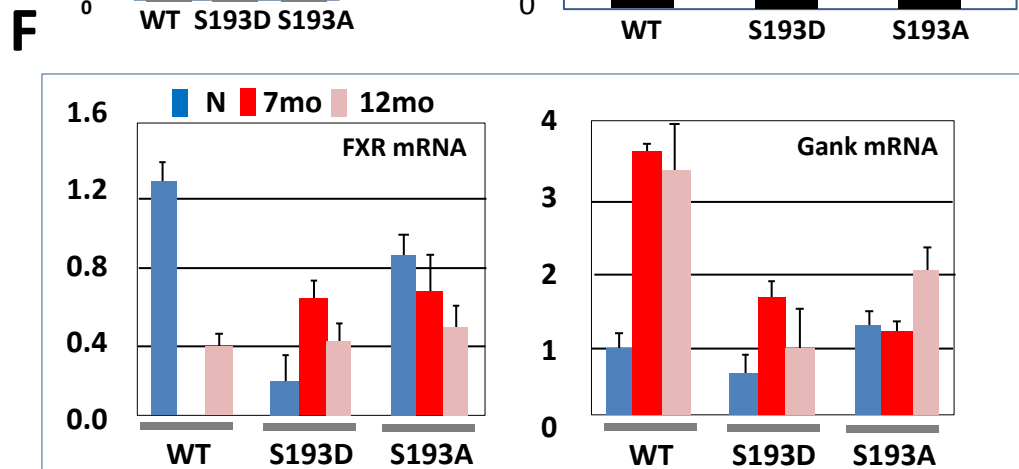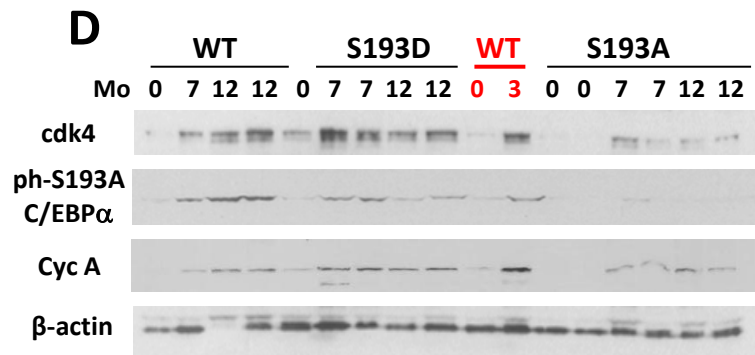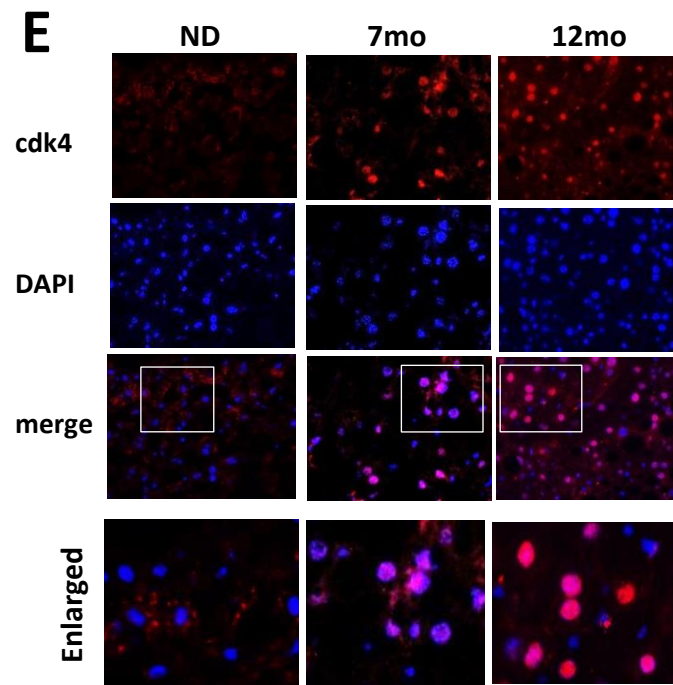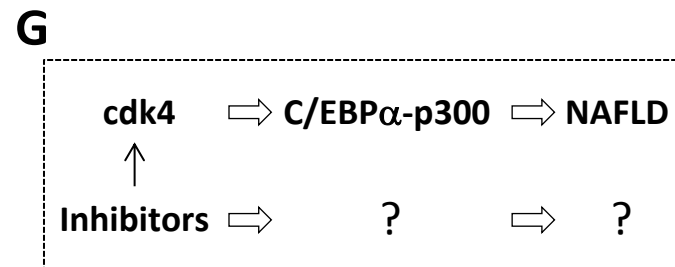

Supplement: NIHMS795342-supplement-4.pdf [file NIHMS795342-supplement-4.pdf]

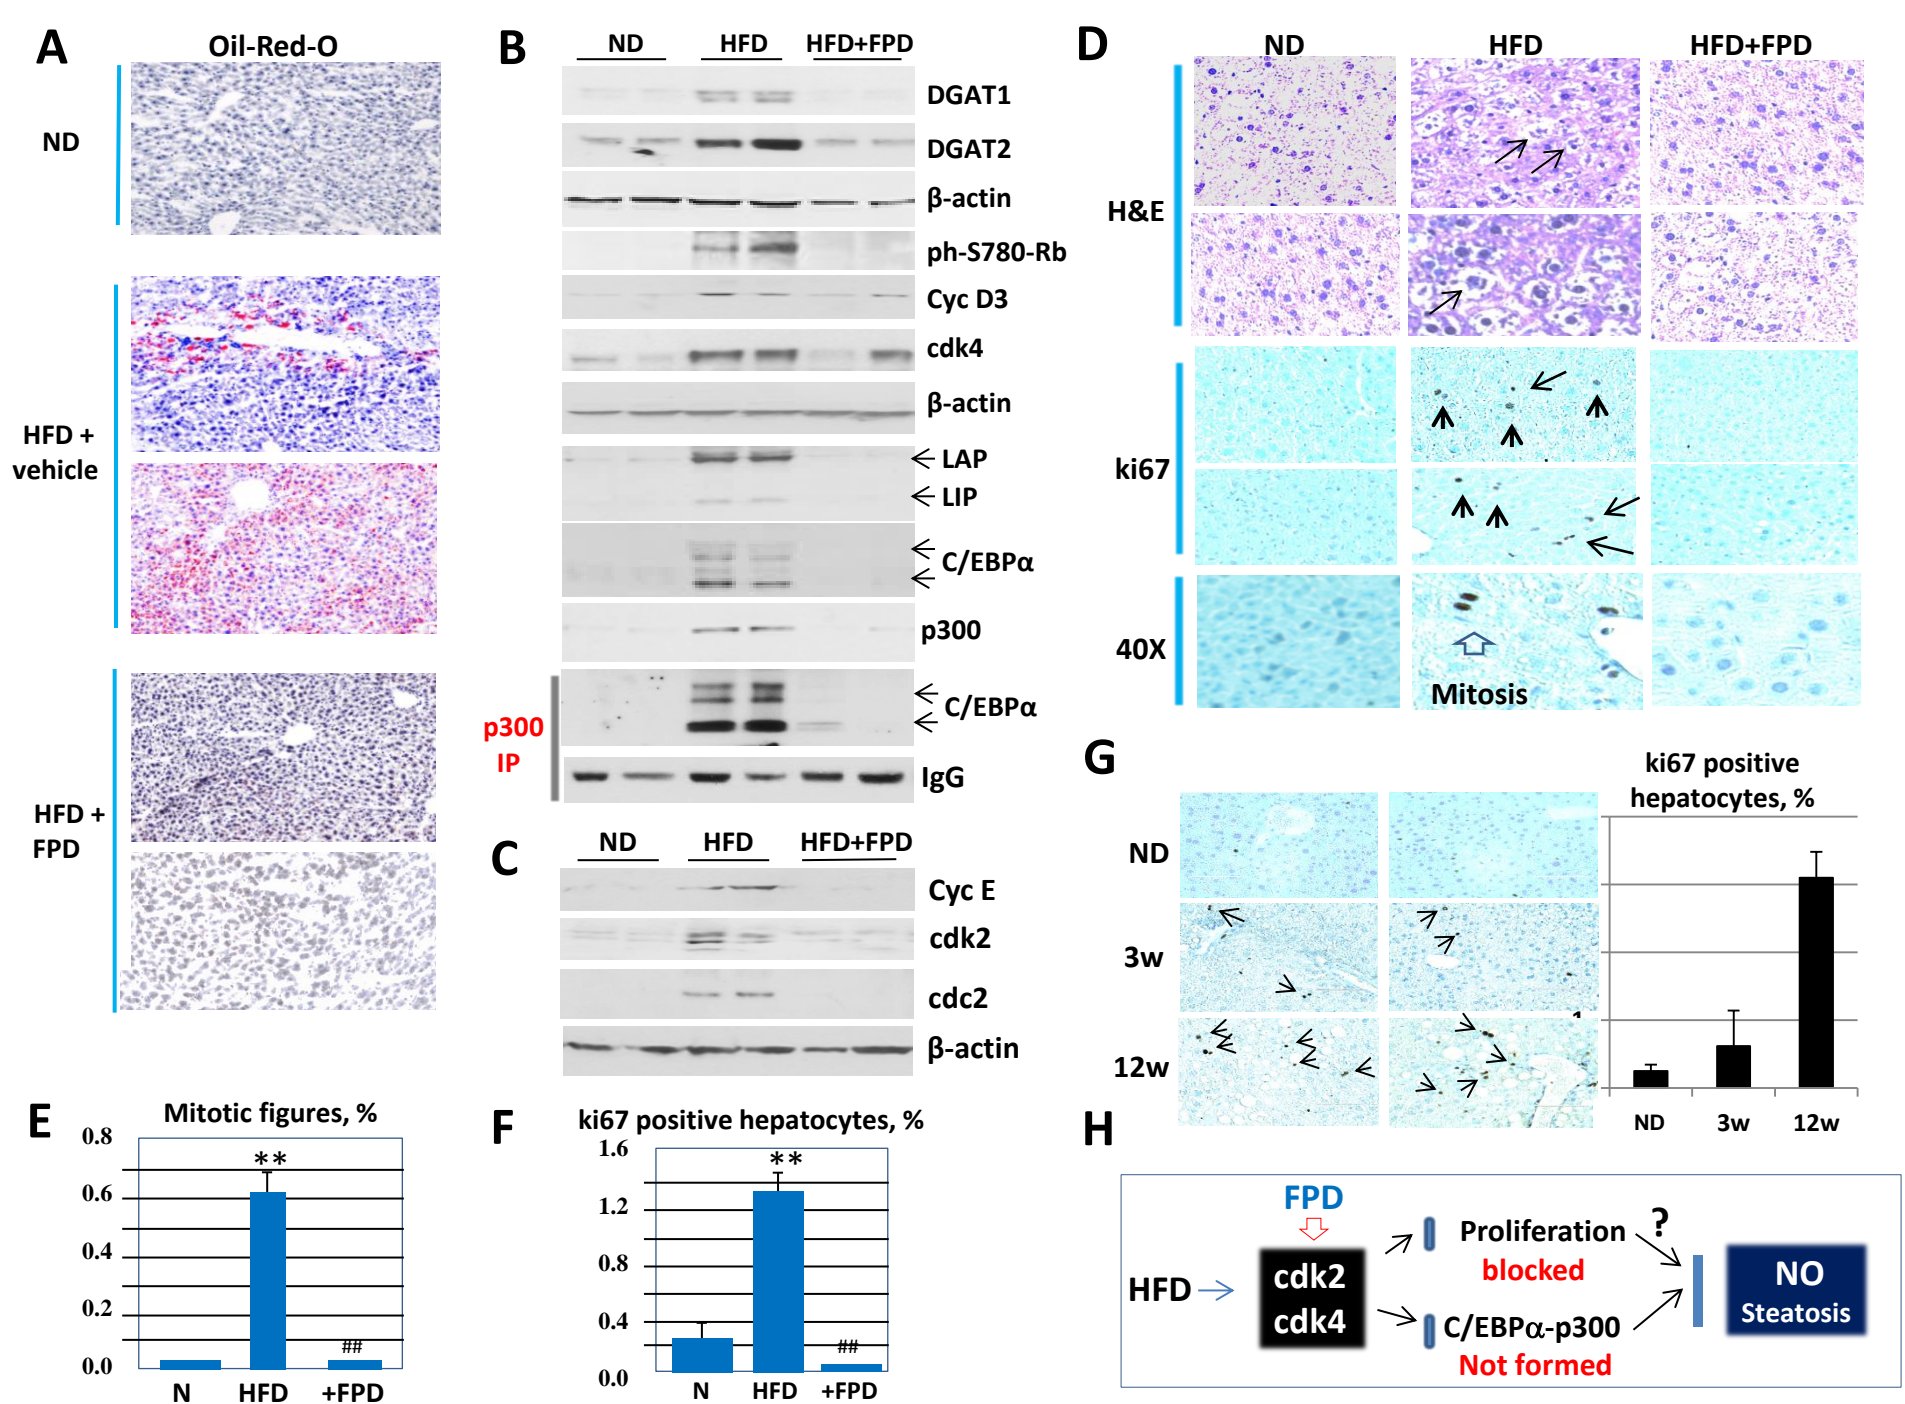

Supplement: NIHMS795342-supplement-5.pdf [file NIHMS795342-supplement-5.pdf]

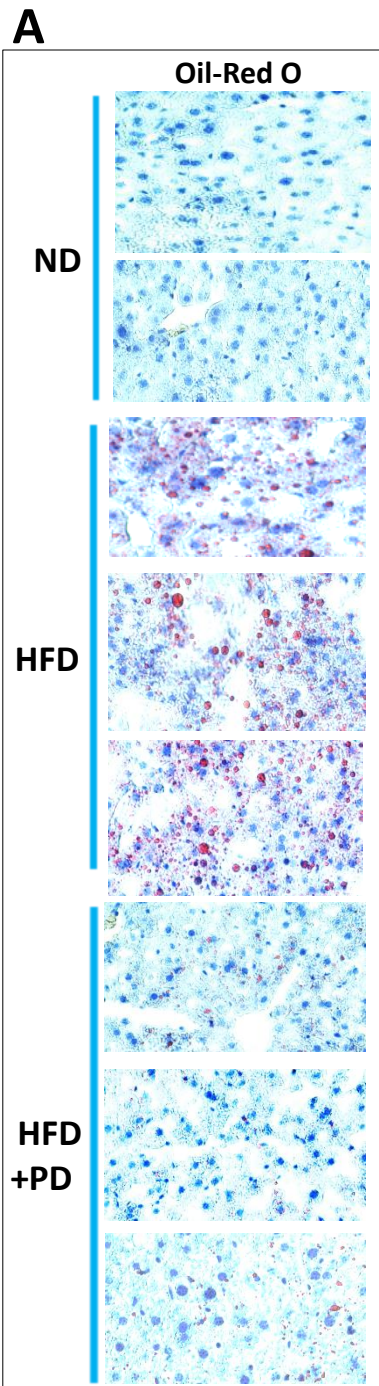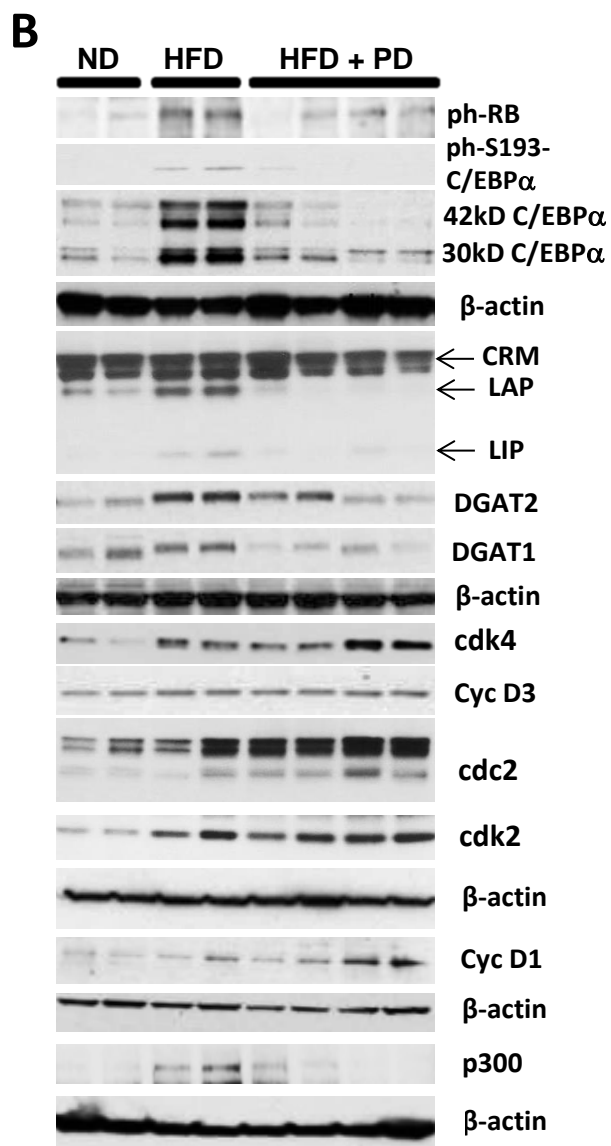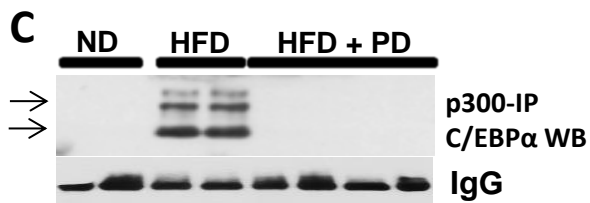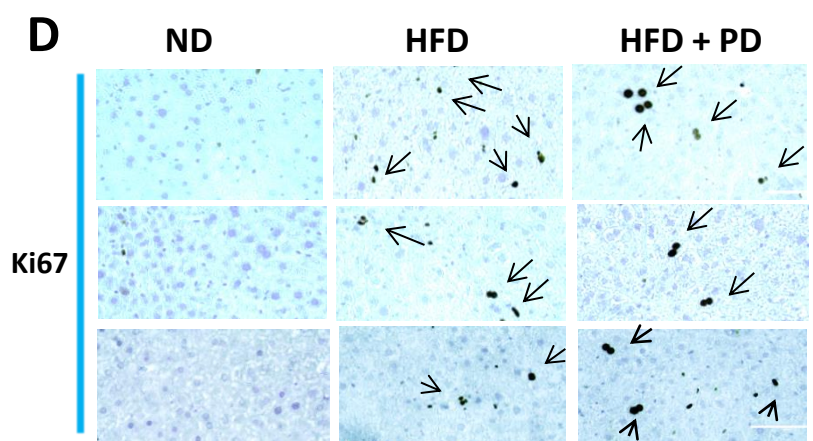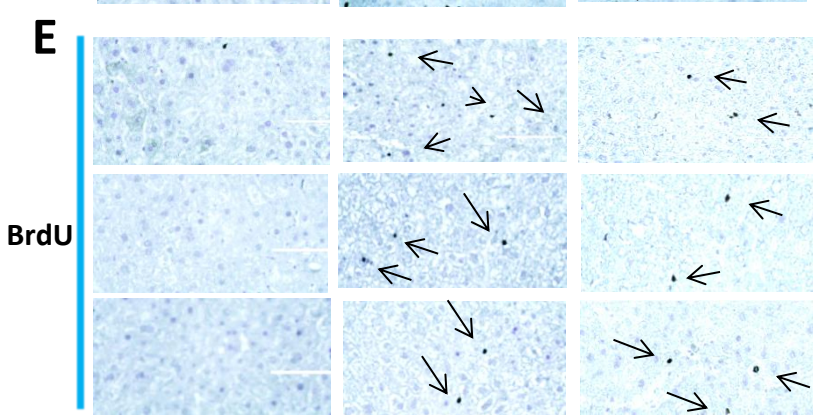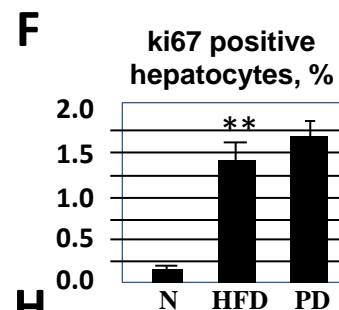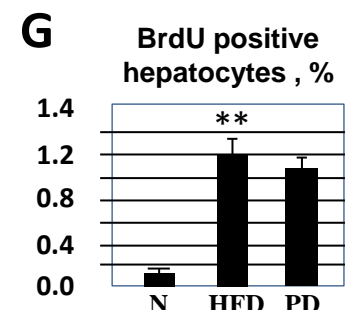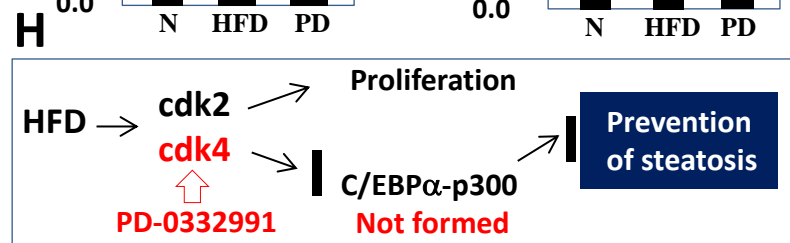

Supplement: NIHMS795342-supplement-6.pdf [file NIHMS795342-supplement-6.pdf]

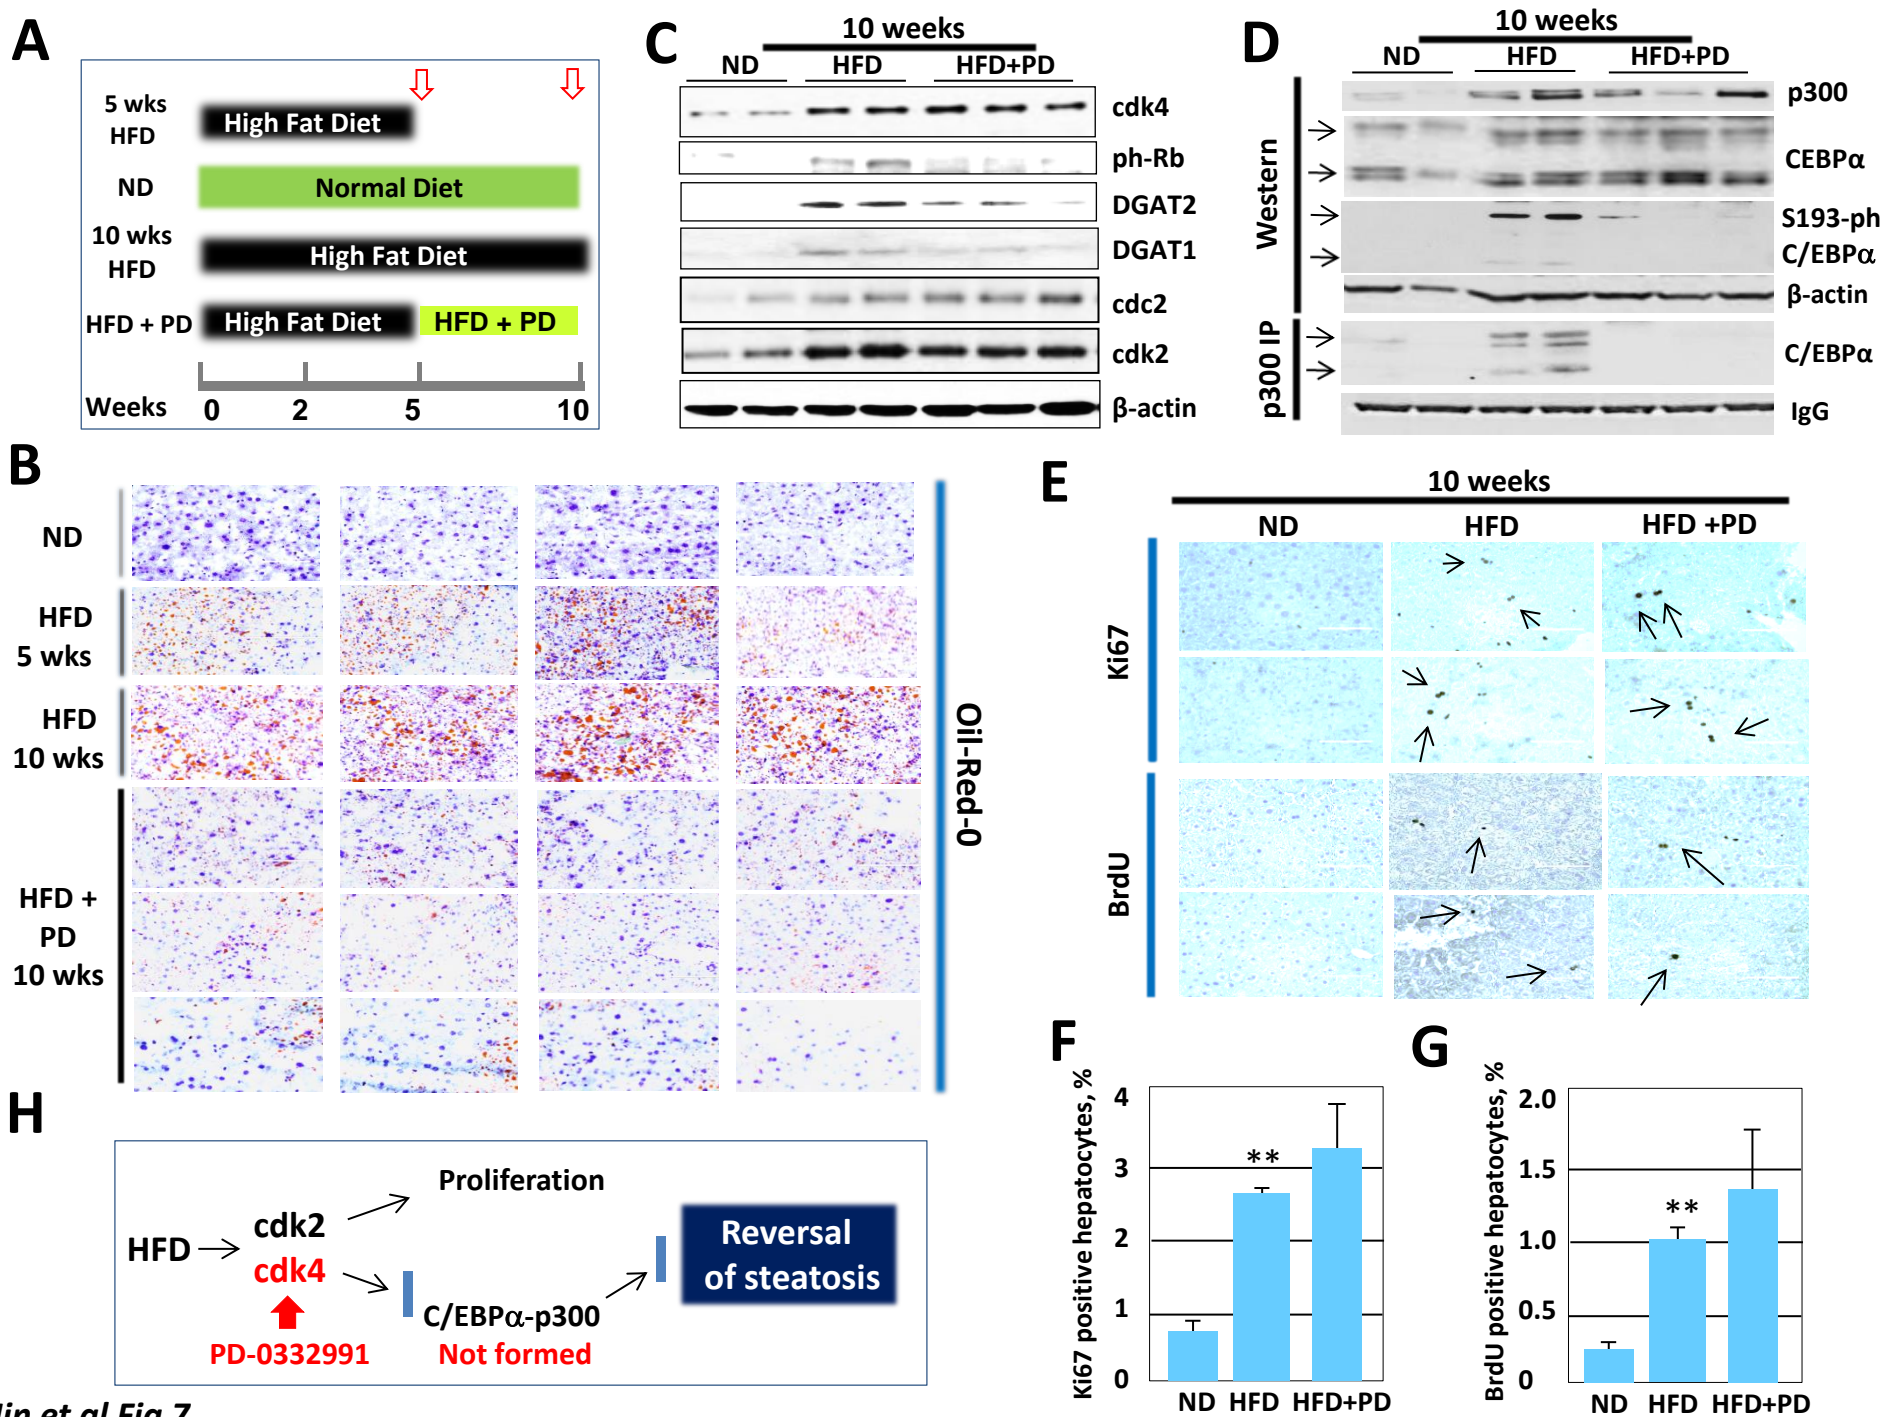

Supplement: NIHMS795342-supplement-7.pdf [file NIHMS795342-supplement-7.pdf]
